# Supplementary material
Source: publisher figshare collection journal article supplement (https://sage.figshare.com/ndownloader/files/10822022)
Supplement: Supplementary file 1 [file 10822022]

## Online Appendix A1: Overview of recent literature reviews

| <b>Authors</b>             | <b>Summary</b>                                                                                                                                                                                                                                                                                                                                                                                                                                                                                                                                                                                                                                                                               | <b>Methodology</b>                 |
|----------------------------|----------------------------------------------------------------------------------------------------------------------------------------------------------------------------------------------------------------------------------------------------------------------------------------------------------------------------------------------------------------------------------------------------------------------------------------------------------------------------------------------------------------------------------------------------------------------------------------------------------------------------------------------------------------------------------------------|------------------------------------|
| Raisch & Birkenshaw (2008) | <ul style="list-style-type: none"> <li>• Focus on ambidexterity research.</li> <li>• Develop a comprehensive framework that covers research on the antecedents (structure, context, leadership), moderators (dynamism, competitive dynamics, market orientation, resource endowment, firm scope), and performance outcomes (accounting, market, growth) of organizational ambidexterity.</li> <li>• Future research recommendations include the need to clearly identify the level of analysis is identified; research the interrelationships between the various antecedents; investigate several performance dimensions; and study the evolution of ambidextrous organizations.</li> </ul> | Qualitative review                 |
| Simsek (2008)              | <ul style="list-style-type: none"> <li>• Develop a multi-level model of ambidexterity.</li> <li>• Levels include: organization level (antecedent and moderator); interfirm level (antecedent); and environmental level (moderators).</li> </ul>                                                                                                                                                                                                                                                                                                                                                                                                                                              | Qualitative review                 |
| Lavie et al. (2010)        | <ul style="list-style-type: none"> <li>• Develop a framework comprising the antecedents (dynamism, shocks, competitive intensity, absorptive capacity, slack resources, organizational structure, culture, age, and size, as well as managerial inclinations) and consequences of exploration and exploitation and their balance.</li> <li>• Conceptual and empirical gaps, such as empirical evidence on the benefits of balance between exploration and exploitation, are identified, and directions for future research are provided.</li> </ul>                                                                                                                                          | Qualitative review                 |
| Nosella et al. (2012)      | <ul style="list-style-type: none"> <li>• Focus on ambidexterity research.</li> <li>• Previous research classified into (1) Foundations: Structural solution, (2) Contextual solution, (3) Antecedents and consequences of ambidexterity, and (4) Cross-boundary perspectives.</li> <li>• Findings suggest that organizational ambidexterity research has evolved from the original definition of the construct as a capability for resolving tensions.</li> <li>• Most previous research has focused on macro-level aspects.</li> </ul>                                                                                                                                                      | Factor analysis of 55 articles     |
| Mueller et al. (2013)      | <ul style="list-style-type: none"> <li>• Focus on exploratory and exploitative innovation.</li> <li>• Impact of institutional conditions differs between exploratory and exploitative innovation.</li> </ul>                                                                                                                                                                                                                                                                                                                                                                                                                                                                                 | Meta-analysis of 46 studies.       |
| Turner et al. (2013)       | <ul style="list-style-type: none"> <li>• Focus on ambidexterity research.</li> <li>• Develop a framework integrating intellectual capital resources (organizational, social and human capital) across various levels of analysis (organization, group and individual).</li> </ul>                                                                                                                                                                                                                                                                                                                                                                                                            | Qualitative review of 119 articles |

|                           |                                                                                                                                                                                                                                                                                                                                                                                                              |                                                            |
|---------------------------|--------------------------------------------------------------------------------------------------------------------------------------------------------------------------------------------------------------------------------------------------------------------------------------------------------------------------------------------------------------------------------------------------------------|------------------------------------------------------------|
| Junni et al. (2013)       | <ul style="list-style-type: none"> <li>• Focus on ambidexterity research.</li> <li>• Ambidexterity has positive performance implications especially in non-manufacturing organizations and at higher levels of analysis.</li> <li>• Performance effects are dependent on the measurement of ambidexterity and applied research design.</li> <li>• Identified moderator: environmental conditions.</li> </ul> | Meta-analysis of 69 papers with 135 samples                |
| Almahendra & Ambos (2015) | <ul style="list-style-type: none"> <li>• Identifying citation patterns.</li> <li>• Five intellectual foundations identified (absorptive capacity, behavioral theory of the firm, evolutionary theory, resource-based view, knowledge-based view).</li> <li>• Turning points (i.e., seminal articles) are identified and discussed.</li> </ul>                                                                | Bibliometric analysis of the references of 145 articles    |
| Fourne et al. (2016)      | <ul style="list-style-type: none"> <li>• Find a positive and heterogeneous relationship between exploration and exploitation.</li> <li>• Identify organizational size, inter- and intrafirm modes of operation, and environmental factors (industry and technological intensity) as important factors.</li> </ul>                                                                                            | Meta-analysis of 108 primary studies with 117 effect sizes |

---

## **Online Appendix A2: Method description**

### **Bibliographic coupling**

Bibliographic coupling is one of main quantitative methods for mapping the structure and development of scientific fields and disciplines (Zupic and Čater, 2015). Even though it has been traditionally less popular than co-citation analysis in the field of Business and Management, it is a very powerful tool with multiple attractive features for studies, and it has been becoming more popular within the past years (e.g. Nosella et al., 2012; Vogel and Güttel, 2012; Devinney and Hohberger, 2016). The main point of distinction is that bibliographic coupling uses the shared number of references between two publications to measure the proximity between these two publications (Kessler, 1963). This is different from co-citations analysis, where the proximity between two publications is measured by the number of shared citations by other publications (Small, 1973). It is important to note that bibliographic coupling is a static approach as the number of shared references between two publications remains constant over time (Zupic and Čater, 2015). Therefore, it is well suited for analyzing trends in current research, even if they have not been cited yet (Zupic and Čater, 2015; Vogel and Güttel, 2012). Co-citation analysis, on the other hand, is a dynamic approach, because by the number of shared citations by other publications can increase with each number of articles that cites both publications (Zupic and Čater, 2015; Vogel and Güttel, 2012). As a consequence, older publications can accumulate more citations than newer publications and thus, co-citation results can be biased towards the more recent publications. Furthermore, bibliographic coupling and co-citation analysis operate at different levels of analysis (Vogel and Güttel, 2012). Co-citation analysis uses cited publications (references) to measure the similarity between two publications, while bibliographic coupling uses references to measure the proximity of two citing publications. We are particularly interested in the academic structure within the publications citing March (1991) (and not his references), thus, we applied bibliographic coupling. However, we also have conducted co-citation analysis and the results can be requested by the authors.

In applying bibliographic coupling we followed previous research, in particular, Zupic and Čater (2015) and Randhawa et al. (2016). First we calculated the coupling based proximity scores using the BibExcel software package (Persson et al., 2009). We then use the proximity scores to analyze and visualize the relationship between the publications using network and network community analysis. Within bibliometric studies, network approaches have become increasingly popular (e.g. Nosella et al., 2012; Vogel and Güttel, 2012;

Randhawa et al., 2016; Zupic and Čater, 2015), as they provide an accurate, effective, and readable visualization of a larger number of documents in a meaning full ways (Zupic and Čater, 2015; Randhawa et al., 2016; Vogel and Güttel, 2012). Whereas other analysis and visualization techniques (e.g., exploratory factor analysis and multi-dimensional scaling) frequently benefit from a normalization of the proximity scores, this is not always the case for network-based approach (Zupic and Čater, 2015; Wallace et al., 2009). In our case, the results did not improve (or even worsened), by normalizing with the Salton's cosine (Salton and McGill, 1986), thus, we use the raw scores. To visualize the network, we apply the 'Force Atlas 3D' network algorithm implemented in the Gephi software package (Bastian et al., 2009). In a second step we used the "Louvain" modularity optimization method to identify research clusters (Blondel et al., 2008). Thereby, the number of cluster is based on the resolution coefficient (Lambiotte et al., 2008). Starting from the default value of 1.0, we experimented with various resolution coefficients in an iterative interactive fashion to find the sound clustering. The quality of the solutions was judged with a modularity parameter (minimum of 0.4) (Blondel et al., 2008) and by a qualitative assessment of the results.

### **Leximancer**

Leximancer has been used in previous literature reviews (Wilden et al., 2016; Randhawa et al., 2016; Biesenthal and Wilden, 2014; Liesch et al., 2011) to investigate what authors are actually writing about. The software conducts both conceptual (thematic) and relational (semantic) analysis of textual data (Rooney, 2005), thus allowing researchers to analyze concepts (common text elements) and themes (groupings of revealed concepts). The algorithm automatically selects the most appropriate number of themes depending on the identified concepts and allows overlapping of clusters. Leximancer is appropriate for our exploratory research as it delivers high reproducibility and reliability of concept identifications and clustering, reducing biases typically underlying manually coded text analyses (Dann, 2010; Smith and Humphreys, 2006). Furthermore, Leximancer has high face validity as its algorithms are profoundly rooted in recognized practice such as Bayesian decision theory and computational linguistics. Finally, Leximancer exhibits high correlative validity as it has been found to reveal patterns that correlate with other modes of pattern identification such as human coding (see, e.g., Grech et al., 2002; Wilden et al., 2017).

After downloading the relevant articles, we cleaned and prepared the textual data, converted the files into machine-readable format and deleted the references (Netzer et al., 2012). This phase includes typical procedures, such as name and term preservation,

tokenization, and using a stop list (Grech et al., 2002). We merged word variants (e.g., “explore” and “exploration”) and applied Leximancer’s default stop word list (e.g., “and,” “always,” “just”), supplemented by terms without specific meaning in our textual data (e.g., “et,” “al.,” “table,” “figure”). Next, Leximancer generates concept seeds “automatically using a ranking algorithm for finding seed words which reflect the themes present in the data. This process looks for words near the center of local maxima in the lexical co-occurrence network” (Smith, 2003: 23). The aim of this phase was to uncover word clusters, which, when combined as a concept, maximize the relevancy of all the other words in the data. The learning algorithm starts with a partial concept definition (seeds) and extends the definition to find additional words (e.g., modifiers, synonyms) that convey the equivalent meaning. Leximancer weighs the seeds with the frequency with which they occur in sentences, including the concept, compared to how frequently the seeds appear in other parts of the textual data. This categorization of words is driven by the software algorithm and thus minimizes researcher bias. Additionally, predefined dictionaries may “restrict the exploration of material to a limited scope, and limit the possibility of having new concepts emerge from the material” (Indulska et al., 2012: 49). The concepts (dots in the figures) are word clusters conveying related meanings. The Leximancer default settings were used for the total number of concepts, learning threshold, etc.; however, we opted to exclude name-like concepts (i.e., words starting with a capital letter).

This process resulted in the automatically created dictionary comprising relevant concepts. We reviewed this initial concept list created by Leximancer through a Bayesian algorithm and deleted concepts that often occur in academic writing (e.g., “respondent,” “literature,” “significant”). Next, using the developed thesaurus, the data were marked with the identified concepts to a two-sentence resolution. The software algorithm considers a concept to appear in a sentence block if enough accrued evidence (the sum of the weights of the keywords) is found.

Subsequently, the concepts were mapped in a semantic network by applying an asymmetric scaling algorithm and ranking the concepts by their connectedness, based on the co-occurrence frequencies. Consequently, the algorithm extends beyond simply looking at concepts occurrences, and evaluates the proximity between concepts depending on how often they co-appear in the text. In these maps of meaning, “entity concepts are clustered according to weight and relationship, to create a concept cluster map” (Grech et al., 2002: 1719). Then, the concepts are grouped them into themes. Finally, we inspected the resulting maps of meaning and their statistical information, investigated the maps stability by rerunning the

algorithm several times and decided on the best number of themes by using the default setting. Thus, the final Leximancer outputs discussed in this paper are the result of the research team's reading of the conceivable structure of the data.

### Online Appendix A3: Publication coupling Figure 1

| Cluster | Publication                                | Citation | Year |
|---------|--------------------------------------------|----------|------|
| 1       | Slater, SF; Narver, JC 1995                | 1115     | 1995 |
| 1       | Moorman, C; Miner, AS 1997                 | 367      | 1997 |
| 1       | Miller, D 1993                             | 302      | 1993 |
| 1       | Lewin, AY; Volberda, HW 1999               | 292      | 1999 |
| 1       | Baum, JAC; Ingram, P 1998                  | 258      | 1998 |
| 1       | Miner, AS; Bassoff, P; Moorman, C 2001     | 229      | 2001 |
| 1       | Newman, KL 2000                            | 209      | 2000 |
| 1       | Olson, EM; Slater, SF; Hult, GTM 2005      | 199      | 2005 |
| 1       | Miner, AS; Mezas, SJ 1996                  | 169      | 1996 |
| 1       | Denrell, J; March, JG 2001                 | 150      | 2001 |
| 1       | Miller, D; Chen, MJ 1996                   | 147      | 1996 |
| 1       | Denrell, J 2003                            | 138      | 2003 |
| 1       | McKelvey, B 1999                           | 138      | 1999 |
| 1       | Miner, AS; Haunschild, PR 1995             | 136      | 1995 |
| 1       | Henderson, AD 1999                         | 113      | 1999 |
| 1       | Mezas, SJ; Glynn, MA 1993                  | 102      | 1993 |
| 1       | Miller, D 1996                             | 102      | 1996 |
| 2       | Barkema, HG; Vermeulen, F 1998             | 482      | 1998 |
| 2       | Grant, RM; Baden-Fuller, C 2004            | 445      | 2004 |
| 2       | Koza, MP; Lewin, AY 1998                   | 375      | 1998 |
| 2       | Madhok, A 1997                             | 320      | 1997 |
| 2       | Vermeulen, F; Barkema, H 2001              | 298      | 2001 |
| 2       | Luo, YD; Peng, MW 1999                     | 295      | 1999 |
| 2       | Barringer, BR; Harrison, JS 2000           | 294      | 2000 |
| 2       | Dussauge, P; Garrette, B; Mitchell, W 2000 | 274      | 2000 |
| 2       | Chang, SJ; Rosenzweig, PM 2001             | 216      | 2001 |
| 2       | Inkpen, AC 2000                            | 177      | 2000 |
| 2       | Hoffmann, WH 2007                          | 133      | 2007 |
| 2       | Goerzen, A 2007                            | 109      | 2007 |
| 3       | Zahra, SA; George, G 2002                  | 1866     | 2002 |
| 3       | Zollo, M; Winter, SG 2002                  | 1385     | 2002 |
| 3       | Teece, DJ 2007                             | 1124     | 2007 |
| 3       | Benner, MJ; Tushman, ML 2003               | 855      | 2003 |
| 3       | Gold, AH; Malhotra, A; Segars, AH 2001     | 664      | 2001 |
| 3       | Borgatti, SP; Cross, R 2003                | 515      | 2003 |
| 3       | Lado, AA; Wilson, MC 1994                  | 501      | 1994 |
| 3       | Danneels, E 2002                           | 480      | 2002 |
| 3       | Benner, MJ 2002                            | 330      | 2002 |
| 3       | Matusik, SF; Hill, CWL 1998                | 292      | 1998 |
| 3       | Zott, C 2003                               | 273      | 2003 |
| 3       | Helfat, CE; Raubitschek, RS 2000           | 265      | 2000 |
| 3       | McEvily, SK; Chakravarthy, B 2002          | 236      | 2002 |
| 3       | Mahoney, JT 1995                           | 218      | 1995 |
| 3       | Schreyogg, G; Kliesch-Eberl, M 2007        | 198      | 2007 |
| 3       | Nonaka, I; von Krogh, G; Voelpel, S 2006   | 194      | 2006 |
| 3       | Jarzabkowski, P 2004                       | 183      | 2004 |
| 3       | Karim, S; Mitchell, W 2000                 | 178      | 2000 |

| Cluster | Publication                                                                   | Citation | Year |
|---------|-------------------------------------------------------------------------------|----------|------|
| 3       | Felin, T; Hesterly, WS 2007                                                   | 175      | 2007 |
| 3       | McGrath, RG; MacMillan, IC; Venkataraman, S 1995                              | 162      | 1995 |
| 3       | Kraaijenbrink, J; Spender, JC; Groen, AJ 2010                                 | 158      | 2010 |
| 3       | Volberda, HW; Lewin, AY 2003                                                  | 146      | 2003 |
| 3       | Argote, L; Miron-Spektor, E 2011                                              | 133      | 2011 |
| 3       | Argote, L; Greve, HR 2007                                                     | 112      | 2007 |
| 3       | Hitt, MA; Ireland, RD; Lee, HU 2000                                           | 107      | 2000 |
| 3       | Lumpkin, GT 2005                                                              | 101      | 2005 |
| 4       | Gupta, AK; Smith, KG; Shalley, CE 2006                                        | 600      | 2006 |
| 4       | Subramaniam, M; Youndt, MA 2005                                               | 591      | 2005 |
| 4       | Jansen, JJP; Van den Bosch, FAJ; Volberda, HW 2006                            | 447      | 2006 |
| 4       | Raisch, S; Birkinshaw, J 2008                                                 | 363      | 2008 |
| 4       | Smith, WK; Tushman, ML 2005                                                   | 329      | 2005 |
| 4       | Raisch, S; Birkinshaw, J; Probst, G; Tushman, ML 2009                         | 300      | 2009 |
| 4       | Lubatkin, MH; Simsek, Z; Ling, Y; Veiga, JF 2006                              | 296      | 2006 |
| 4       | Lavie, D; Rosenkopf, L 2006                                                   | 294      | 2006 |
| 4       | O'Reilly, CA; Tushman, ML 2008                                                | 219      | 2008 |
| 4       | Kang, SC; Morris, SS; Snell, SA 2007                                          | 212      | 2007 |
| 4       | Smith, WK; Lewis, MW 2011                                                     | 205      | 2011 |
| 4       | Lichtenthaler, U 2009                                                         | 193      | 2009 |
| 4       | van Wijk, R; Jansen, JJP; Lyles, MA 2008                                      | 185      | 2008 |
| 4       | Cao, Q; Gedajlovic, E; Zhang, HP 2009                                         | 165      | 2009 |
| 4       | Jansen, JJP; Tempelaar, MP; van den Bosch, FAJ; Volberda, HW 2009             | 156      | 2009 |
| 4       | Lavie, D; Stettner, U; Tushman, ML 2010                                       | 151      | 2010 |
| 4       | Lichtenthaler, U; Lichtenthaler, E 2009                                       | 139      | 2009 |
| 4       | Farjoun, M 2010                                                               | 137      | 2010 |
| 4       | Uotila, J; Maula, M; Keil, T; Zahra, SA 2009                                  | 135      | 2009 |
| 4       | Danneels, E 2008                                                              | 130      | 2008 |
| 4       | Zhou, KZ; Wu, F 2010                                                          | 115      | 2010 |
| 4       | Simsek, Z 2009                                                                | 112      | 2009 |
| 4       | Davis, JP; Eisenhardt, KM; Bingham, CB 2009                                   | 109      | 2009 |
| 4       | Mom, TJM; Van den Bosch, FAJ; Volberda, HW 2007                               | 104      | 2007 |
| 4       | Kang, SC; Snell, SA 2009                                                      | 103      | 2009 |
| 5       | Burt, RS 2000                                                                 | 960      | 2000 |
| 5       | Katila, R; Ahuja, G 2002                                                      | 725      | 2002 |
| 5       | Rosenkopf, L; Nerkar, A 2001                                                  | 657      | 2001 |
| 5       | Ahuja, G; Lampert, CM 2001                                                    | 524      | 2001 |
| 5       | Fleming, L 2001                                                               | 463      | 2001 |
| 5       | Sorensen, JB; Stuart, TE 2000                                                 | 456      | 2000 |
| 5       | Rosenkopf, L; Almeida, P 2003                                                 | 390      | 2003 |
| 5       | Rothaermel, FT 2001                                                           | 287      | 2001 |
| 5       | Fleming, L; Sorenson, O 2001                                                  | 281      | 2001 |
| 5       | Nooteboom, B; Van Haverbeke, W; Duysters, G; Gilsing, V; van den Oord, A 2007 | 253      | 2007 |
| 5       | Fleming, L; Sorenson, O 2004                                                  | 245      | 2004 |
| 5       | Almeida, P; Phene, A 2004                                                     | 221      | 2004 |
| 5       | Katila, R 2002                                                                | 194      | 2002 |
| 5       | Ahuja, G; Katila, R 2004                                                      | 188      | 2004 |



| <b>Cluster</b> | <b>Publication</b>                                                              | <b>Citation</b> | <b>Year</b> |
|----------------|---------------------------------------------------------------------------------|-----------------|-------------|
| 5              | Phene, A; Fladmoe-Lindquist, K; Marsh, L 2006                                   | 146             | 2006        |
| 5              | McGrath, RG; Nerkar, A 2004                                                     | 142             | 2004        |
| 5              | Gilsing, V; Nooteboom, B; Vanhaverbeke, W;<br>Duysters, G; van den Oord, A 2008 | 140             | 2008        |
| 5              | Phelps, CC 2010                                                                 | 136             | 2010        |
| 5              | Nerkar, A 2003                                                                  | 135             | 2003        |
| 5              | Nerkar, A; Roberts, PW 2004                                                     | 107             | 2004        |
| 5              | Nerkar, A; Paruchuri, S 2005                                                    | 105             | 2005        |
| 5              | Katila, R; Shane, S 2005                                                        | 103             | 2005        |

## Online Appendix A4: Coupling analysis

The following figures show the coupling analysis using network analysis and community detection (Blondel et al. 2008) for three broad time periods. As in the earlier networks, the nodes represent individual publications and the edges represent the connection between articles based on the proximity scores (shared references). To ease the interpretation and to focus on the most relevant publications, the network graph is based on publications with a degree range  $> 2$  and proximity scores  $> 0.1$ . Additionally, the size associated with each of the publications is weighted with the number of citations a publication received.

**Figure A4-1: Coupling 1991-2000**

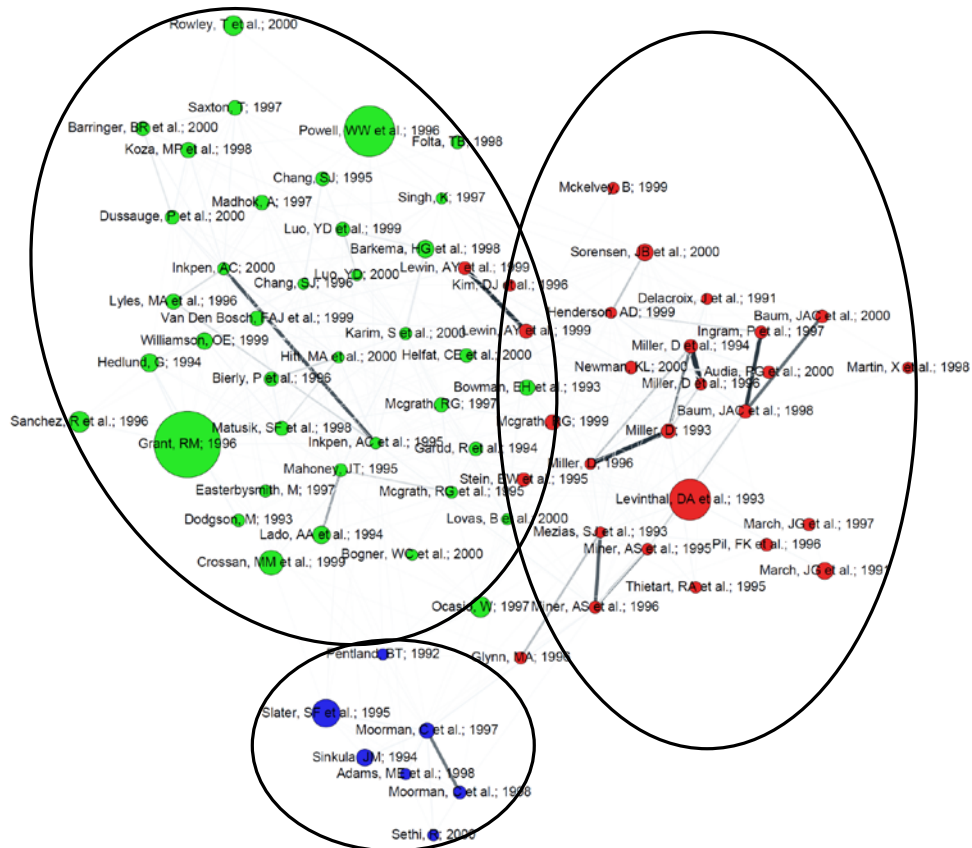

**Figure A4-2: Coupling 2001-2010**

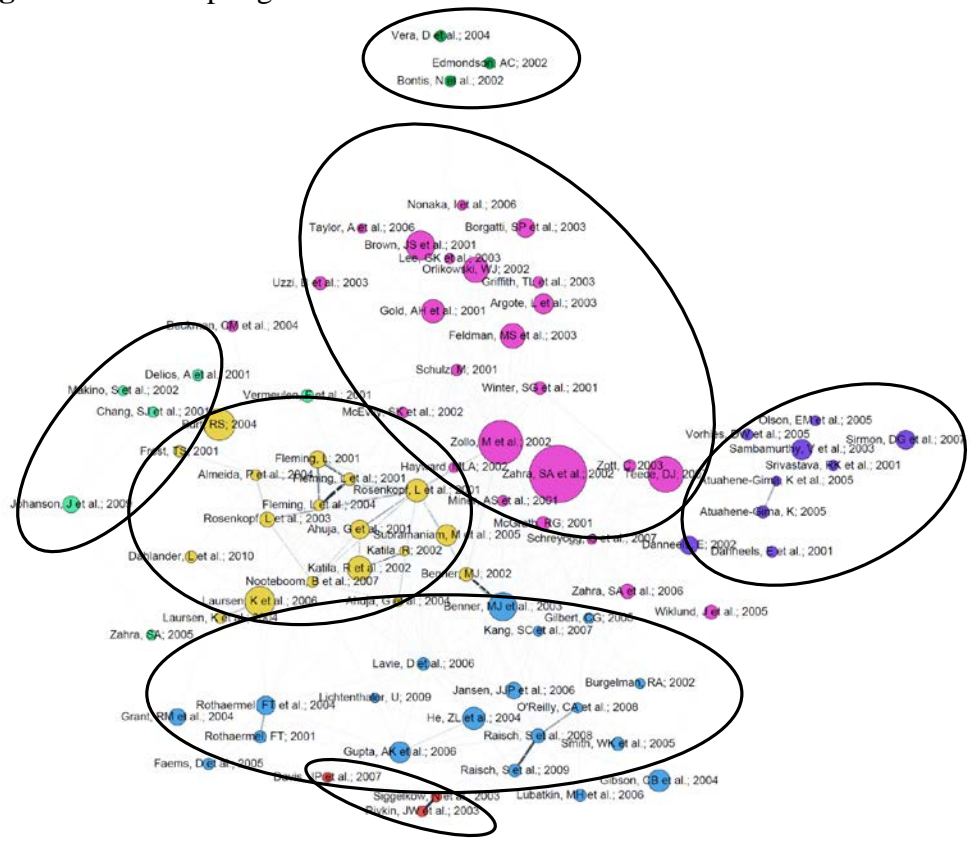

**Figure A4-3: Coupling 2011-2016**

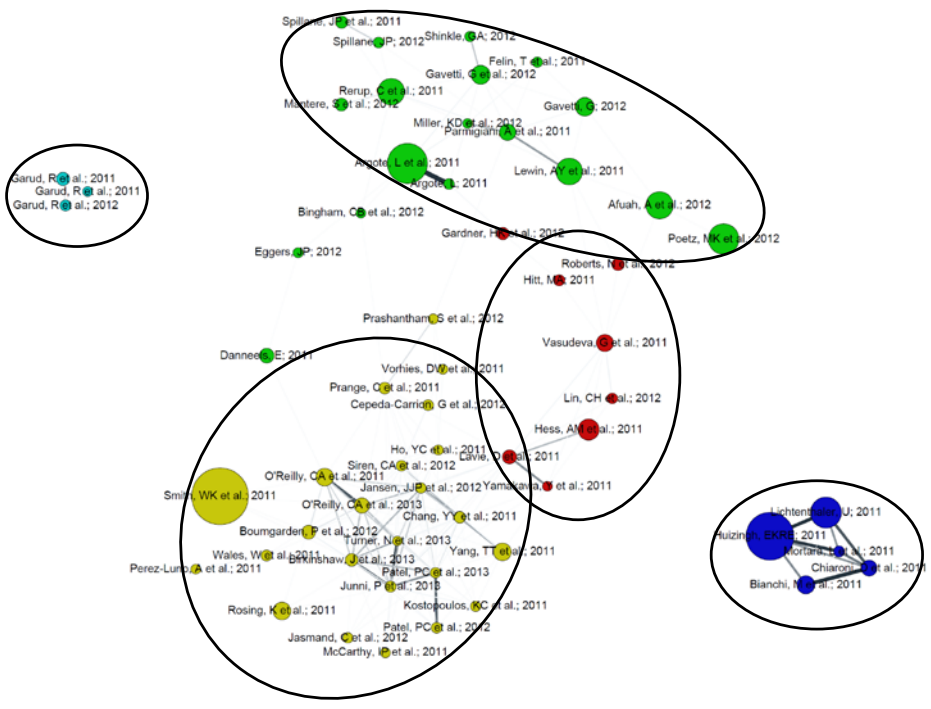

**Online Appendix A5: Central themes in evolution of research citing March (1991)**

| 2017          |          | 2016         |          | 2015          |          | 2014          |          | 2013          |          | 2012          |          |
|---------------|----------|--------------|----------|---------------|----------|---------------|----------|---------------|----------|---------------|----------|
| Theme         | Connect. | Theme        | Connect. | Theme         | Connect. | Theme         | Connect. | Theme         | Connect. | Theme         | Connect. |
| firms         | 100%     | firms        | 100%     | firms         | 100%     | innovation    | 100%     | firms         | 100%     | firms         | 100%     |
| performance   | 82%      | knowledge    | 83%      | exploration   | 78%      | organization  | 91%      | performance   | 76%      | development   | 70%      |
| exploration   | 64%      | development  | 79%      | innovation    | 73%      | develop       | 81%      | organization  | 47%      | exploration   | 58%      |
| relationship  | 47%      | exploration  | 68%      | organization  | 70%      | exploration   | 81%      | management    | 45%      | performance   | 51%      |
| strategic     | 25%      | management   | 58%      | knowledge     | 54%      | firm          | 71%      | strategic     | 38%      | knowledge     | 50%      |
| market        | 23%      | innovation   | 50%      | development   | 52%      | knowledge     | 61%      | knowledge     | 31%      | management    | 46%      |
| technological | 19%      | organization | 46%      | managers      | 50%      | performance   | 56%      | relationship  | 27%      | process       | 43%      |
| development   | 19%      | learning     | 34%      | process       | 40%      | strategic     | 51%      | context       | 12%      | organization  | 27%      |
| ambidexterity | 10%      | value        | 27%      | strategic     | 28%      | management    | 47%      | external      | 8%       | technological | 19%      |
| product       | 8%       | design       | 22%      | network       | 11%      | technology    | 43%      | network       | 8%       | market        | 15%      |
| levels        | 8%       | dynamic      | 14%      |               |          | social        | 31%      | social        | 6%       | business      | 11%      |
| network       | 8%       | industry     | 12%      |               |          | network       | 16%      |               |          | context       | 10%      |
| social        | 6%       | change       | 11%      |               |          | value         | 13%      |               |          | change        | 9%       |
|               |          | r&d          | 8%       |               |          | change        | 12%      |               |          | ambidexterity | 8%       |
| 2011          |          | 2010         |          | 2009          |          | 2008          |          | 2007          |          | 2006          |          |
| Theme         | Connect. | Theme        | Connect. | Theme         | Connect. | Theme         | Connect. | Theme         | Connect. | Theme         | Connect. |
| firms         | 100%     | firms        | 100%     | firms         | 100%     | innovation    | 100%     | firms         | 100%     | firms         | 100%     |
| organization  | 45%      | innovation   | 65%      | management    | 64%      | development   | 96%      | performance   | 54%      | organization  | 71%      |
| management    | 40%      | organization | 48%      | exploration   | 64%      | organization  | 85%      | exploration   | 53%      | performance   | 55%      |
| exploration   | 39%      | knowledge    | 45%      | strategic     | 46%      | firms         | 70%      | technological | 50%      | exploration   | 46%      |
| learning      | 22%      | exploration  | 36%      | innovation    | 44%      | performance   | 62%      | knowledge     | 45%      | management    | 37%      |
| development   | 19%      | learning     | 24%      | organization  | 40%      | knowledge     | 49%      | learning      | 40%      | knowledge     | 32%      |
| relationship  | 14%      | role         | 21%      | performance   | 38%      | capabilities  | 47%      | organization  | 36%      | learning      | 32%      |
| market        | 14%      | management   | 19%      | learning      | 37%      | learning      | 27%      | management    | 20%      | systems       | 19%      |
| network       | 9%       | business     | 17%      | knowledge     | 27%      | technological | 19%      | capabilities  | 20%      | relationship  | 15%      |
| change        | 5%       | value        | 14%      | activities    | 13%      | information   | 16%      | business      | 18%      | exploitation  | 15%      |
|               |          | market       | 13%      | resources     | 8%       | business      | 10%      | industry      | 13%      | industry      | 11%      |
|               |          | network      | 9%       | ambidexterity | 4%       |               |          | social        | 7%       | value         | 11%      |
|               |          | change       | 9%       |               |          |               |          |               |          | social        | 5%       |

| 2005         |          | 2004                     |          | 2003          |          | 2002          |          | 2001          |          | 2000           |          |
|--------------|----------|--------------------------|----------|---------------|----------|---------------|----------|---------------|----------|----------------|----------|
| Theme        | Connect. | Theme                    | Connect. | Theme         | Connect. | Theme         | Connect. | Theme         | Connect. | Theme          | Connect. |
| management   | 100%     | organization             | 100%     | organization  | 100%     | organization  | 100%     | organization  | 100%     | organization   | 100%     |
| organization | 97%      | firms                    | 74%      | firms         | 72%      | management    | 80%      | firms         | 97%      | firms          | 73%      |
| firms        | 87%      | development              | 65%      | strategic     | 40%      | processes     | 69%      | technological | 61%      | development    | 63%      |
| strategic    | 62%      | exploration              | 59%      | technology    | 40%      | firms         | 51%      | strategy      | 55%      | product        | 51%      |
| performance  | 52%      | technological            | 49%      | exploration   | 16%      | experience    | 21%      | product       | 47%      | competitive    | 32%      |
| development  | 51%      | strategic                | 16%      | performance   | 12%      | performance   | 19%      | change        | 41%      | context        | 29%      |
| learning     | 44%      | process                  | 15%      | market        | 12%      | practice      | 12%      | exploration   | 34%      | performance    | 17%      |
| exploration  | 26%      | social                   | 9%       | information   | 11%      | capabilities  | 10%      | learning      | 25%      | business       | 11%      |
| business     | 12%      | future                   | 5%       | change        | 8%       | quality       | 6%       | projects      | 14%      | transformation | 11%      |
| industry     | 9%       |                          |          | individual    | 7%       | role          | 5%       | activities    | 14%      | exploration    | 10%      |
| social       | 8%       |                          |          | exploitation  | 5%       | strategy      | 5%       | experience    | 10%      | network        | 6%       |
|              |          | role                     | 5%       |               |          |               |          | exploitation  | 10%      |                |          |
| 1999         |          | 1998                     |          | 1997          |          | 1996          |          | 1995          |          | 1994           |          |
| Theme        | Connect. | Theme                    | Connect. | Theme         | Connect. | Theme         | Connect. | Theme         | Connect. | Theme          | Connect. |
| organization | 100%     | knowledge                | 100%     | organization  | 100%     | firms         | 100%     | literature    | 100%     | time           | 100%     |
| firms        | 76%      | organization             | 87%      | behavior      | 57%      | organization  | 59%      | sequential    | 14%      | firm           | 91%      |
| process      | 57%      | development              | 50%      | process       | 39%      | technological | 45%      | process       | 4%       | market         | 89%      |
| knowledge    | 38%      | management               | 50%      | performance   | 22%      | performance   | 28%      |               |          | knowledge      | 89%      |
| complexity   | 28%      | problem                  | 45%      | change        | 19%      | change        | 14%      |               |          | organization   | 60%      |
| performance  | 27%      | processes                | 40%      | insights      | 9%       | innovation    | 14%      |               |          | understanding  | 57%      |
| strategy     | 25%      | mechanisms               | 38%      | rate          | 4%       | competitive   | 7%       |               |          | performance    | 49%      |
| failure      | 21%      | learning                 | 38%      | exploration   | 4%       |               |          |               |          | exploration    | 45%      |
| management   | 18%      | control                  | 37%      |               |          |               |          |               |          | learning       | 28%      |
| change       | 13%      | technology               | 18%      |               |          |               |          |               |          | product        | 23%      |
| information  | 8%       | market                   | 14%      |               |          |               |          |               |          | attributes     | 13%      |
|              |          | exploration              | 10%      |               |          |               |          |               |          | exploitation   | 9%       |
| 1993         |          | 1992                     |          | 1991          |          |               |          |               |          |                |          |
| Theme        | Connect. | <i>insufficient data</i> |          | Theme         | Connect. |               |          |               |          |                |          |
| innovation   | 100%     |                          |          | exploration   | 100%     |               |          |               |          |                |          |
| organization | 59%      |                          |          | event-history | 100%     |               |          |               |          |                |          |
| used         | 50%      |                          |          | organization  | 75%      |               |          |               |          |                |          |
| successful   | 41%      |                          |          | history       | 75%      |               |          |               |          |                |          |
| rules        | 38%      |                          |          |               |          |               |          |               |          |                |          |
| allocation   | 9%       |                          |          |               |          |               |          |               |          |                |          |

Note: Connect. (connectivity) indicates the importance of the respective theme relative to the most central theme.

Note: 2017 data only includes articles published by September.

- Bastian M, Heymann S and Jacomy M (2009) Gephi: an open source software for exploring and manipulating networks. *ICWSM* 8: 361-362.
- Biesenthal C and Wilden R (2014) Multi-level Project Governance: Trends and Opportunities. *International Journal of Project Management* 32: 1291–1308.
- Blondel VD, Guillaume J-L, Lambiotte R, et al. (2008) Fast unfolding of communities in large networks. *Journal of Statistical Mechanics: Theory and Experiment* 2008: P10008.
- Dann S (2010) Redefining social marketing with contemporary commercial marketing definitions. *Journal of Business Research* 63: 147-153.
- Devinney TM and Hohberger J (2016) The Past is Prologue: Moving on from Culture's Consequences. *Journal of International Business Studies* forthcoming.
- Fourné S, Jansen JJ and Rosenbusch N (2016) A meta-analysis of the relationship between exploration and exploitation. *Academy of Management Proceedings*. Academy of Management, 10872.
- Grech MR, Horberry T and Smith A (2002) Human error in maritime operations: Analyses of accident reports using the leximancer tool. *Proceedings of the Human Factors and Ergonomics Society Annual Meeting*. SAGE Publications, 1718-1721.
- Indulska M, Hovorka SD and Recker J (2012) Quantitative approaches to content analysis: identifying conceptual drift across publication outlets. *European Journal of Information Systems* 21: 49-69.
- Junni P, Sarala RM, Taras V, et al. (2013) Organizational ambidexterity and performance: A meta-analysis. *The Academy of Management Perspectives* 27: 299-312.
- Kessler MM (1963) Bibliographic coupling between scientific papers. *American documentation* 14: 10-25.
- Lambiotte R, Delvenne J-C and Barahona M (2008) Laplacian dynamics and multiscale modular structure in networks. *arXiv preprint arXiv:0812.1770*.
- Liesch PW, Håkanson L, McGaughey SL, et al. (2011) The evolution of the international business field: a scientometric investigation of articles published in its premier journal. *Scientometrics* 88: 17-42.
- Mueller V, Rosenbusch N and Bausch A (2013) Success patterns of exploratory and exploitative innovation: A meta-analysis of the influence of institutional factors. *Journal of Management* 39: 1606-1636.
- Netzer O, Feldman R, Goldenberg J, et al. (2012) Mine your own business: Market-structure surveillance through text mining. *Marketing Science* 31: 521-543.
- Nosella A, Cantarello S and Filippini R (2012) The intellectual structure of organizational ambidexterity: A bibliographic investigation into the state of the art. *Strategic Organization* 10: 450-465.
- Persson O, Danell R and Schneider JW (2009) How to use Bibexcel for various types of bibliometric analysis. *Celebrating scholarly communication studies: A Festschrift for Olle Persson at his 60th Birthday*: 9-24.
- Randhawa K, Wilden R and Hohberger J (2016) A Bibliometric Review of Open Innovation: Setting a Research Agenda. *Journal of Product Innovation Management*: n/a-n/a.
- Rooney D (2005) Knowledge, economy, technology and society: the politics of discourse. *Telematics and Informatics* 22: 405-422.
- Salton G and McGill MJ (1986) Introduction to modern information retrieval.
- Small H (1973) Co-citation in the scientific literature: A new measure of the relationship between two documents. *Journal of the American Society for information Science* 24: 265-269.
- Smith AE (2003) Automatic extraction of semantic networks from text using Leximancer. *Proceedings of the 2003 Conference of the North American Chapter of the Association for Computational Linguistics on Human Language Technology: Demonstrations-Volume 4*. Association for Computational Linguistics, 23-24.

- Smith AE and Humphreys MS (2006) Evaluation of unsupervised semantic mapping of natural language with Leximancer concept mapping. *Behavior Research Methods* 38: 262-279.
- Vogel R and Güttel WH (2012) The Dynamic Capability View in Strategic Management: A Bibliometric Review. *International Journal of Management Reviews*.
- Wallace ML, Gingras Y and Duhon R (2009) A new approach for detecting scientific specialties from raw cocitation networks. *Journal of the American Society for Information Science and Technology* 60: 240-246.
- Wilden R, Akaka MA, Karpen IO, et al. (2017) The Evolution and Prospects of Service-Dominant Logic. *Journal of Service Research* 20: 345-361.
- Wilden R, Devinney TM and Dowling GR (2016) The Architecture of Dynamic Capability Research Identifying the Building Blocks of a Configurational Approach. *The academy of management annals* 10: 997-1076.
- Zupic I and Čater T (2015) Bibliometric Methods in Management and Organization. *Organizational Research Methods* 18: 429-472.
